# Supplementary material
Source: publisher site journal article supplement (https://www.dovepress.com/article/566289)

**Figure S1：**Kaplan-Meier survival curves for OS, evaluating the impact of hypertension status in low-NPAR and high-NPAR subgroups.

**Notes:** (A) OS comparison by hypertension status (No vs. Yes) in the low-NPAR subgroup (p=0.027); (B) OS comparison by hypertension status (No vs. Yes) in the high-NPAR subgroup (p=0.005). The blue curve represents patients with hypertension, and the yellow curve represents patients without hypertension.

**Abbreviations:** OS, overall survival; LA-NPC, locally advanced nasopharyngeal carcinoma.


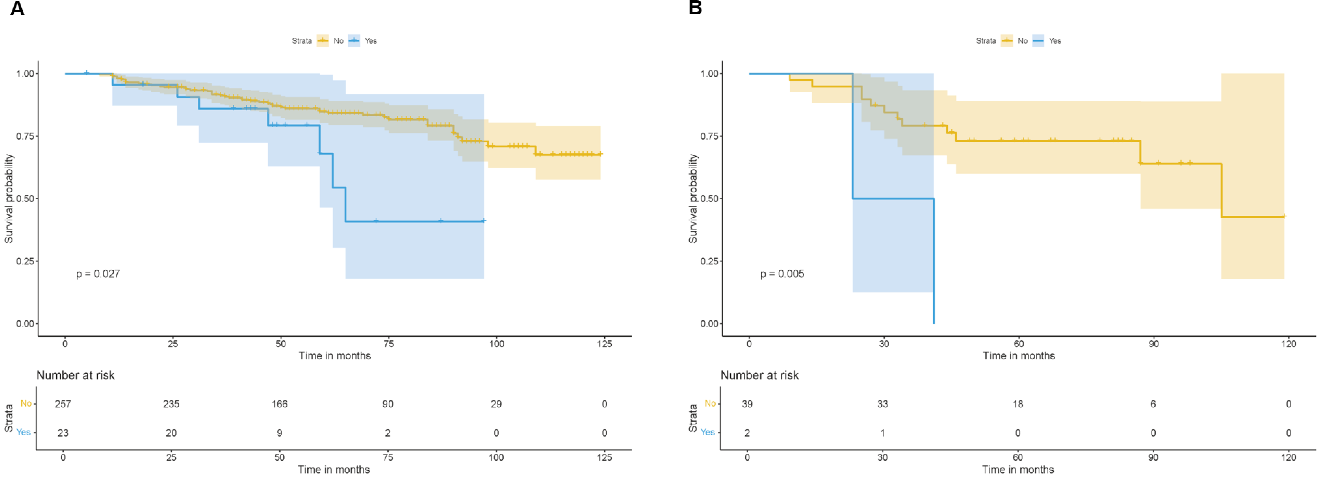

Supplement: Supplementary file 1 [file 566289%20Revised%20Supplementary%20Material.docx]
